# Supplementary material for: Phylogenomics unravels speciation patterns in temperate-montane plant species: a case study on the recently radiating Ranunculus auricomus species complex
Source: bioRxiv or medRxiv preprint supplement (doi:10.1101/2020.01.06.895904), 2020-01-07
Supplement: Supplementary file [file media-5.pdf]

**Table S4** Number and percentage of mapped read per sample.

| <b>Sample no.</b> | <b>Taxon</b>                       | <b>Total nr. reads</b> | <b>Nr. paired reads</b> | <b>Nr. forward unpaired reads</b> | <b>Nr. reverse unpaired reads</b> | <b>Nr. mapped reads</b> | <b>Percentage of mapped reads</b> |
|-------------------|------------------------------------|------------------------|-------------------------|-----------------------------------|-----------------------------------|-------------------------|-----------------------------------|
| DU003-1           | <i>Ranunculus austroslovenicus</i> | 828673                 | 387692                  | 9204                              | 4216                              | 662966                  | 80.003                            |
| LH012-8           | <i>Ranunculus austroslovenicus</i> | 1144964                | 535481                  | 11436                             | 6398                              | 935564                  | 81.711                            |
| 2                 | <i>Ranunculus calapius</i>         | 1136354                | 542744                  | 33091                             | 4235                              | 305569                  | 26.89                             |
| Du35351-15        | <i>Ranunculus calapius</i>         | 1658283                | 801437                  | 20017                             | 7997                              | 974768                  | 58.781                            |
| 9126-2            | <i>Ranunculus carpaticola</i>      | 1555793                | 758227                  | 19697                             | 9823                              | 857218                  | 55.098                            |
| DU013-1           | <i>Ranunculus carpaticola</i>      | 1449882                | 664408                  | 36202                             | 5318                              | 1079453                 | 74.451                            |
| LH40-4            | <i>Ranunculus carpaticola</i>      | 1100804                | 518871                  | 28544                             | 4068                              | 717409                  | 65.171                            |
| LH006-17          | <i>Ranunculus cassubicifolius</i>  | 1334773                | 624716                  | 29304                             | 5430                              | 910910                  | 68.244                            |
| LH016-14          | <i>Ranunculus cassubicifolius</i>  | 2015353                | 948717                  | 20883                             | 10570                             | 1416897                 | 70.305                            |
| LH008-7           | <i>Ranunculus cassubicifolius</i>  | 1363349                | 646866                  | 17458                             | 7015                              | 927282                  | 68.015                            |
| LH009-3           | <i>Ranunculus cassubicifolius</i>  | 1230345                | 556977                  | 77486                             | 2341                              | 830803                  | 67.526                            |
| Du33354-2         | <i>Ranunculus cebennensis</i>      | 1384000                | 663997                  | 26409                             | 6366                              | 839598                  | 60.664                            |
| DU018-1           | <i>Ranunculus envalirensis</i>     | 880508                 | 409153                  | 11863                             | 4279                              | 615685                  | 69.923                            |
| Du019             | <i>Ranunculus envalirensis</i>     | 1147489                | 518805                  | 81023                             | 2217                              | 611987                  | 53.332                            |
| DU021-1           | <i>Ranunculus flabellifolius</i>   | 1424710                | 674178                  | 13476                             | 8247                              | 1015231                 | 71.258                            |
| DU054-1           | <i>Ranunculus flabellifolius</i>   | 1032953                | 480106                  | 14506                             | 4726                              | 768506                  | 74.398                            |
| LH2501            | <i>Ranunculus flabellifolius</i>   | 984472                 | 466108                  | 20250                             | 3864                              | 618623                  | 62.838                            |
| LH017-1           | <i>Ranunculus marsicus</i>         | 1015923                | 474782                  | 12906                             | 5484                              | 760511                  | 74.859                            |
| LH018-2           | <i>Ranunculus marsicus</i>         | 1342779                | 623287                  | 22667                             | 6395                              | 946497                  | 70.487                            |
| LH014-3           | <i>Ranunculus mediocompositus</i>  | 1290181                | 595665                  | 30227                             | 4615                              | 1041981                 | 80.762                            |
| LH015-10          | <i>Ranunculus mediocompositus</i>  | 1410906                | 653852                  | 17696                             | 6762                              | 1141346                 | 80.894                            |
| 10137-3           | <i>Ranunculus notabilis</i>        | 1283419                | 597695                  | 26682                             | 4787                              | 1008654                 | 78.591                            |
| Hoe5615           | <i>Ranunculus notabilis</i>        | 1379116                | 618222                  | 121175                            | 2219                              | 863888                  | 62.64                             |
| LH010-7           | <i>Ranunculus peracris</i>         | 825825                 | 389990                  | 10395                             | 4167                              | 619412                  | 75.005                            |
| LH011-1           | <i>Ranunculus peracris</i>         | 1254824                | 578191                  | 32232                             | 4542                              | 935436                  | 74.547                            |
| LH011-14          | <i>Ranunculus peracris</i>         | 929053                 | 432644                  | 13306                             | 4441                              | 702164                  | 75.578                            |
| LG09              | <i>Ranunculus pygmaeus</i>         | 1715802                | 795983                  | 19488                             | 8040                              | 1415286                 | 82.485                            |
| 104263            | <i>Ranunculus sceleratus</i>       | 1986542                | 919723                  | 40081                             | 7439                              | 1571110                 | 79.087                            |
| DU049-1           | <i>Ranunculus subcarniolicus</i>   | 1254050                | 580995                  | 14967                             | 6148                              | 994326                  | 79.289                            |
| LH013-3           | <i>Ranunculus subcarniolicus</i>   | 920035                 | 431553                  | 8596                              | 4762                              | 747517                  | 81.248                            |
